# Supplementary material for: A (3,6)-connected layer with an unprecedented adeninate nucleobase-derived heptanuclear disc
Source: Royal Society of Chemistry journal article supplement (doi:10.1039/c4dt04020a), 2015-01-01
Supplement: c4dt04020a1.pdf [file c4dt04020a1.pdf]

## Electronic Supporting Information (ESI)

### A (3,6)-connected layer with unprecedented adeninate nucleobase-derived heptanuclear disc

Zheng-Yu Liu,<sup>a</sup> Hong-Yun Zhang,<sup>a</sup> En-Cui Yang,<sup>a,\*</sup> Zhong-Yi Liu<sup>a</sup> and Xiao-Jun Zhao<sup>a, b,\*</sup>

<sup>a</sup> College of Chemistry, Key Laboratory of Inorganic-Organic Hybrid Functional Material Chemistry, Ministry of Education, Tianjin Key Laboratory of Structure and Performance for Functional Molecules, Tianjin Normal University, Tianjin 300387, P. R. China

<sup>b</sup> Collaborative Center of Chemical Science and Engineering (Tianjin), Tianjin 300071, China

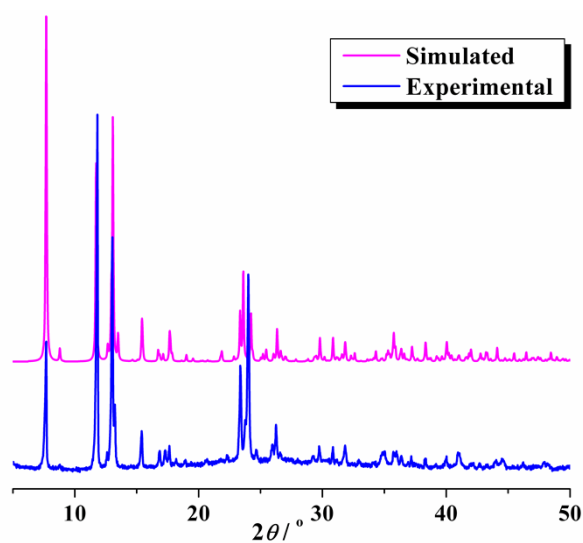

**Fig. S1** Simulated (purple) and experimental (blue) PXRD patterns for **1**.

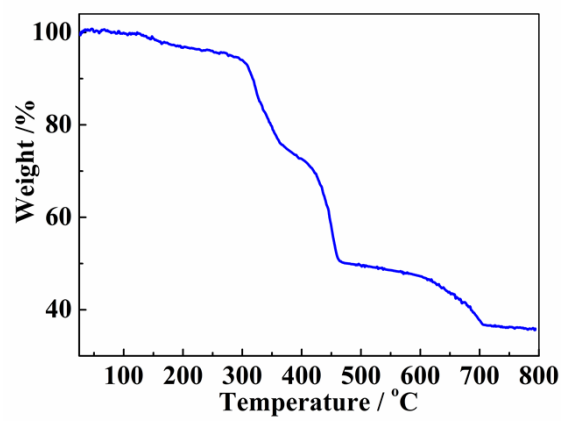

**Fig. S2** TG curve of **1**.

**Table S1** Selected Bond Lengths (Å) and Angles (°) for **1**<sup>a</sup>

|                                              |            |                                               |            |
|----------------------------------------------|------------|-----------------------------------------------|------------|
| Cu(1)–O(9)                                   | 1.979(3)   | Cu(3)–O(10) <sup>#1</sup>                     | 1.981(3)   |
| Cu(1)–O(10)                                  | 2.000(3)   | Cu(3)–N(3)                                    | 2.103(4)   |
| Cu(1)–O(8)                                   | 2.327(4)   | Cu(3)–O(11W)                                  | 2.430(4)   |
| Cu(2)–O(8)                                   | 1.924(3)   | Cu(3)–O(5)                                    | 2.484(4)   |
| Cu(2)–O(3) <sup>#2</sup>                     | 1.973(4)   | Cu(4)–N(9)                                    | 1.880(6)   |
| Cu(2)–O(9)                                   | 1.982(4)   | Cu(4)–O(8) <sup>#1</sup>                      | 1.908(3)   |
| Cu(2)–O(2) <sup>#3</sup>                     | 1.994(4)   | Cu(4)–O(1) <sup>#4</sup>                      | 1.996(4)   |
| Cu(2)–O(11W)                                 | 2.385(4)   | Cu(4)–O(10) <sup>#1</sup>                     | 2.001(4)   |
| Cu(2)–O(12W)                                 | 2.438(4)   | Cu(4)–O(5)                                    | 2.415(4)   |
| Cu(3)–O(9)                                   | 1.945(3)   | Cu(4)–O(12W)                                  | 2.576(3)   |
| Cu(3)–O(4) <sup>#2</sup>                     | 1.976(4)   |                                               |            |
| O(9) <sup>#1</sup> –Cu(1)–O(10)              | 79.66(14)  | O(10) <sup>#1</sup> –Cu(3)–N(3)               | 89.78(19)  |
| O(9)–Cu(1)–O(10)                             | 100.34(14) | O(4) <sup>#2</sup> –Cu(3)–N(3)                | 95.7(2)    |
| O(9) <sup>#1</sup> –Cu(1)–O(8)               | 105.08(13) | O(9)–Cu(3)–O(11W)                             | 85.41(14)  |
| O(9)–Cu(1)–O(8)                              | 74.92(13)  | O(4) <sup>#2</sup> –Cu(3)–O(11W)              | 81.88(15)  |
| O(10) <sup>#1</sup> –Cu(1)–O(8)              | 105.67(13) | O(10) <sup>#1</sup> –Cu(3)–O(11W)             | 90.96(14)  |
| O(10)–Cu(1)–O(8)                             | 74.33(13)  | N(3)–Cu(3)–O(11W)                             | 99.89(18)  |
| O(8)–Cu(2)–O(9)                              | 84.79(15)  | O(9)–Cu(3)–O(5)                               | 89.28(13)  |
| O(3) <sup>#2</sup> –Cu(2)–O(9)               | 94.37(15)  | O(4) <sup>#2</sup> –Cu(3)–O(5)                | 104.93(15) |
| O(8)–Cu(2)–O(2) <sup>#3</sup>                | 93.95(16)  | O(10) <sup>#1</sup> –Cu(3)–O(5)               | 81.87(14)  |
| O(3) <sup>#2</sup> –Cu(2)–O(2) <sup>#3</sup> | 88.96(15)  | N(3)–Cu(3)–O(5)                               | 84.37(18)  |
| O(8)–Cu(2)–O(11W)                            | 86.45(14)  | N(9)–Cu(4)–Cu(2) <sup>#1</sup>                | 150.03(19) |
| O(3) <sup>#2</sup> –Cu(2)–O(11W)             | 84.59(15)  | N(9)–Cu(4)–O(1) <sup>#4</sup>                 | 90.9(2)    |
| O(9)–Cu(2)–O(11W)                            | 85.83(14)  | O(8) <sup>#1</sup> –Cu(4)–O(1) <sup>#4</sup>  | 93.00(16)  |
| O(2) <sup>#3</sup> –Cu(2)–O(11W)             | 107.77(15) | N(9)–Cu(4)–O(10) <sup>#1</sup>                | 93.8(2)    |
| O(8)–Cu(2)–O(12W)                            | 91.36(15)  | O(8) <sup>#1</sup> –Cu(4)–O(10) <sup>#1</sup> | 84.40(14)  |
| O(3) <sup>#2</sup> –Cu(2)–O(12W)             | 97.35(16)  | N(9)–Cu(4)–O(5)                               | 86.5(2)    |
| O(9)–Cu(2)–O(12W)                            | 81.47(15)  | O(8) <sup>#1</sup> –Cu(4)–O(5)                | 85.12(14)  |
| O(2) <sup>#3</sup> –Cu(2)–O(12W)             | 84.90(15)  | O(1) <sup>#4</sup> –Cu(4)–O(5)                | 112.19(16) |
| O(9)–Cu(3)–O(10) <sup>#1</sup>               | 80.97(14)  | O(10) <sup>#1</sup> –Cu(4)–O(5)               | 83.24(14)  |
| O(9)–Cu(3)–O(4) <sup>#2</sup>                | 94.09(15)  |                                               |            |

<sup>a</sup> Symmetry codes: <sup>#1</sup> 1 – x, 1 – y, 2 – z, <sup>#2</sup> 2 – x, –y, 2 – z, <sup>#3</sup> x – 1, y, z + 1, <sup>#4</sup> 2 – x, 1 – y, 1 – z.

**Table S2** The geometric parameters involved in the superexchange pathways within the Cu<sup>II</sup><sub>7</sub> cluster of **1**.

| Coupling constant | pathways | $r_{\text{Cu}\cdots\text{Cu}}$ (Å) |           | $\theta$ (°) | mediator                                                                      | Overlap of the magnetic orbitals                                  | $\angle\text{Cu-O-Cu}$ (°) |
|-------------------|----------|------------------------------------|-----------|--------------|-------------------------------------------------------------------------------|-------------------------------------------------------------------|----------------------------|
| $J_1$             | 1        | Cu1 $\cdots$ Cu4                   | 3.1701(4) | 61.197       | $\mu_3\text{-OH}^-$<br>$\mu_3\text{-OH}^-$                                    | $dz^2-d(x^2-y^2)$<br>$d(x^2-y^2)-d(x^2-y^2)$                      | 96.437(6)<br>104.797(6)    |
|                   | 2        | Cu1 $\cdots$ Cu2                   | 3.1473(3) | 62.712       | $\mu_3\text{-OH}^-$<br>$\mu_3\text{-OH}^-$                                    | $d(x^2-y^2)-d(x^2-y^2)$<br>$dz^2-d(x^2-y^2)$                      | 105.231(6)<br>95.055(5)    |
| $J_2$             | 3        | Cu1 $\cdots$ Cu3                   | 3.0199(4) | 5.257        | $\mu_3\text{-OH}^-$<br>$\mu_3\text{-OH}^-$                                    | $d(x^2-y^2)-d(x^2-y^2)$<br>$d(x^2-y^2)-d(x^2-y^2)$                | 98.698(5)<br>100.633(5)    |
| $J_3$             | 4        | Cu2 $\cdots$ Cu3                   | 3.0922(4) | 60.405       | $\mu\text{-H}_2\text{O}$<br>$\mu_3\text{-OH}^-$<br>$\text{syn,syn-COO}^-$     | $dz^2-dz^2$<br>$d(x^2-y^2)-d(x^2-y^2)$<br>$d(x^2-y^2)-d(x^2-y^2)$ | 79.904(4)<br>103.911(6)    |
|                   | 5        | Cu2 $\cdots$ Cu4                   | 3.0141(4) | 64.411       | $\mu\text{-H}_2\text{O}$<br>$\mu_3\text{-OH}^-$<br>$\mu\text{-syn,syn-COO}^-$ | $dz-dz^2$<br>$d(x^2-y^2)-d(x^2-y^2)$<br>$d(x^2-y^2)-d(x^2-y^2)$   | 73.853(4)<br>103.746(6)    |
| $J_4$             | 6        | Cu3 $\cdots$ Cu4                   | 3.2306(3) | 56.053       | $\mu\text{-SO}_3^-$<br>$\mu_3\text{-OH}^-$<br>$\mu\text{-N3, N9-ade}^-$       | $dz^2-dz^2$<br>$d(x^2-y^2)-d(x^2-y^2)$<br>$d(x^2-y^2)-d(x^2-y^2)$ | 82.488(4)<br>108.439(6)    |

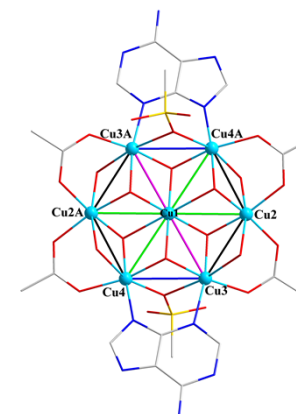

**Table S3** Selected Hydrogen-bonding parameters (Å, °) for **1**<sup>a</sup>

| D-H...A                                   | <i>d</i> (D-H) | <i>d</i> (H...A) | <i>d</i> (D...A) | ∠DHA   |
|-------------------------------------------|----------------|------------------|------------------|--------|
| O10-H10 <sup>#1</sup> ...O6 <sup>#1</sup> | 0.850          | 1.982            | 2.790            | 158.43 |
| O12W-H12A...O6 <sup>#1</sup>              | 0.850          | 2.367            | 2.813            | 113.26 |
| O12W-H12B...N7 <sup>#2</sup>              | 0.850          | 2.062            | 2.880            | 161.44 |
| O11W-H11A...O7 <sup>#3</sup>              | 0.850          | 1.973            | 2.733            | 148.38 |
| O11W-H11B...N1 <sup>#4</sup>              | 0.850          | 1.742            | 2.585            | 170.60 |
| N6-H6B...O2 <sup>#4</sup>                 | 0.860          | 2.379            | 3.183            | 155.84 |

<sup>a</sup> Symmetry codes: <sup>#1</sup> 1 - *x*, 1 - *y*, 1 - *z*, <sup>#2</sup> 1 + *x*, *y*, *z*, <sup>#3</sup> *x*, *y*, *z* - 1, <sup>#4</sup> -*x*, -*y*, 1 - *z*.

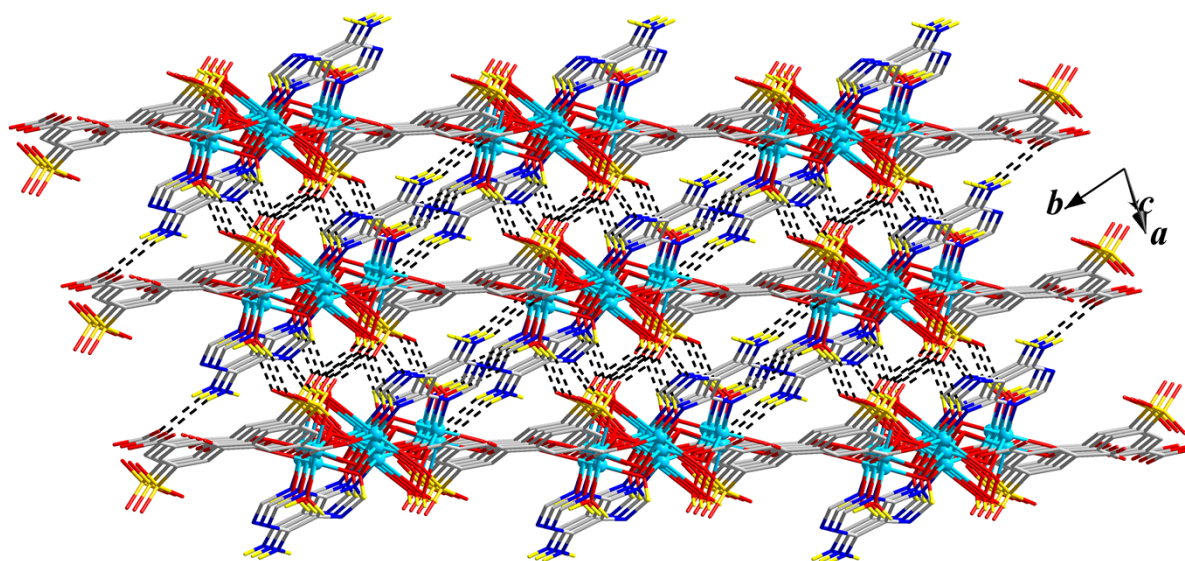

**Fig. S3** 3D supramolecular network of **1** generated by hydrogen-bonding interactions.
